# Supplementary material for: Transcriptomic differences in MSA clinical variants
Source: PubMed Central journal article supplement (PMC7316739; doi:10.1038/s41598-020-66221-4), 2020-06-25
Supplement: 41598_2020_66221_MOESM1_ESM.pdf [file 41598_2020_66221_MOESM1_ESM.pdf]

# Transcriptomic differences in MSA

## clinical variants

Alexandra Pérez Soriano<sup>1,2,3</sup>, Magdalena Arnal Segura<sup>3,4</sup>, Teresa Botta-Orfila<sup>3,5</sup>,  
Darly Giraldo<sup>1</sup>, Manel Fernández<sup>2,6</sup>, Yaroslau Compta<sup>1</sup>, Rubén Fernández-Santiago<sup>2\*</sup>,  
Mario Ezquerro<sup>2\*</sup>, Gian G. Tartaglia<sup>3,6\*</sup>, M.J Martí<sup>1\*</sup>, on behalf of the Catalan MSA  
Registry (CMSAR).

1 Parkinson's Disease & Movement Disorders Unit, Hospital Clínic / IDIBAPS / CIBERNED / European Reference Network for Rare Neurological Diseases (ERN-RND) / Institut de Neurociències, University of Barcelona, Catalonia, Spain. 2 Laboratory of Parkinson Disease and Other Neurodegenerative Movement Disorders, IDIBAPS, Barcelona, Catalonia, Spain. 3 Gene Function and Evolution Group, Centre for Genomic Regulation (CRG), Parc de Recerca Biomèdica de Barcelona (PRBB), Barcelona, Catalonia, Spain. 4 Human Computational Biology Group, Hospital del Mar Medical Research Institute (IMIM), Parc de Recerca Biomèdica de Barcelona (PRBB), Barcelona, Catalonia, Spain. 5 Biological Fluids Biobank; IDIBAPS-Hospital Clinic of Barcelona, Barcelona, Catalonia, Spain. 6 María de Maeztu Unit of Excellence (Institute of Neurosciences, University of Barcelona), Ministry of Science, Innovation and Universities, Barcelona, Catalonia, Spain. 7 Institutio Catalana de Recerca i Estudis Avançats (ICREA), Universitat Pompeu Fabra (UPF), Barcelona, Spain.

### **Corresponding author:**

Prof. María José Martí, MD  
Parkinson's Disease & Movement Disorders Unit  
Neurology Service  
Hospital Clínic de Barcelona  
Carrer de Villarroel, 170  
ES-08036 Barcelona  
mjmarti@clinic.cat

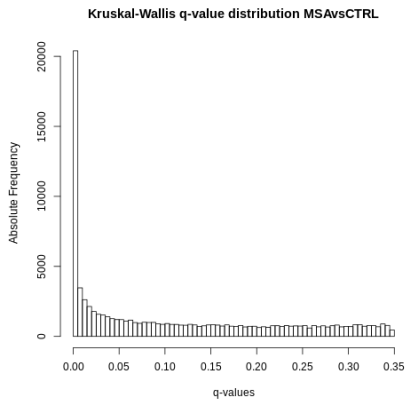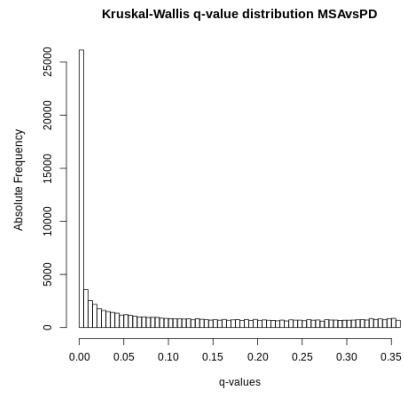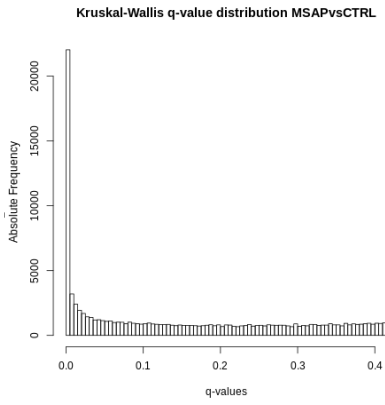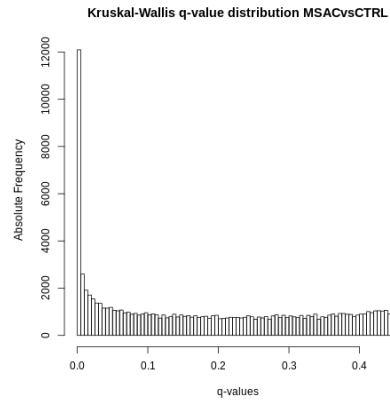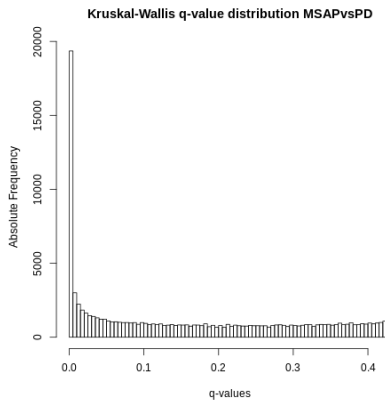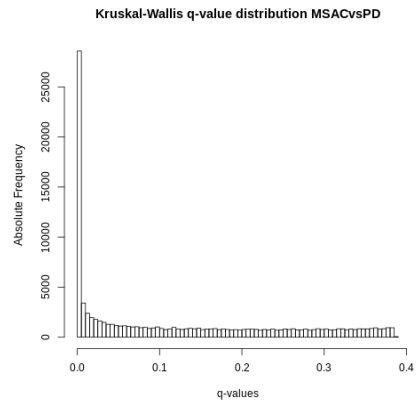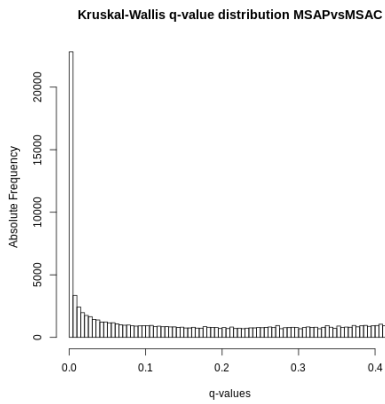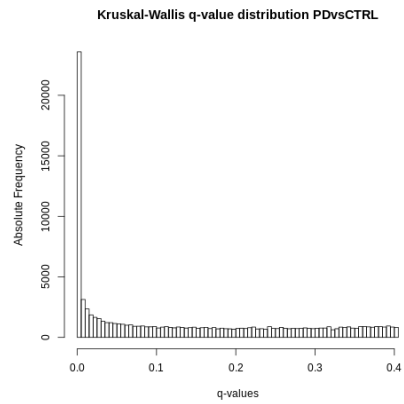

**Figure S1**

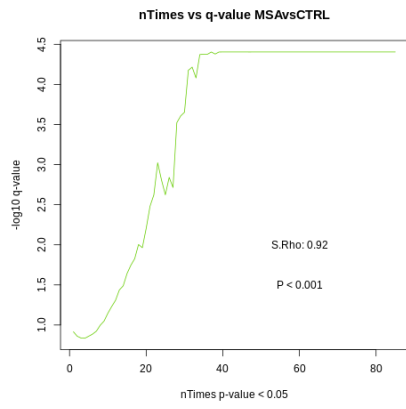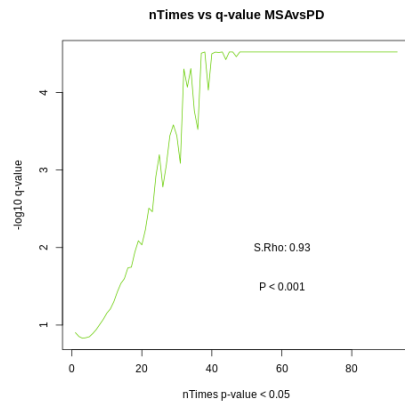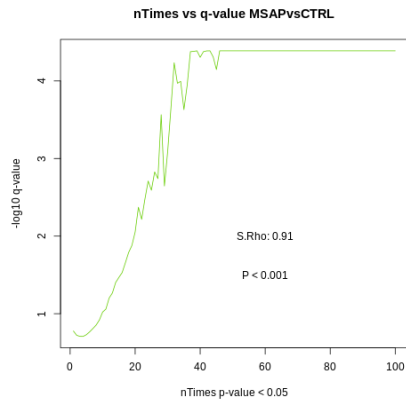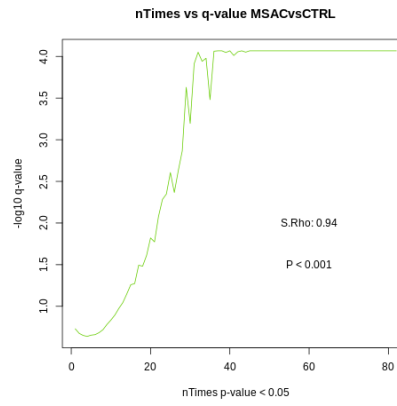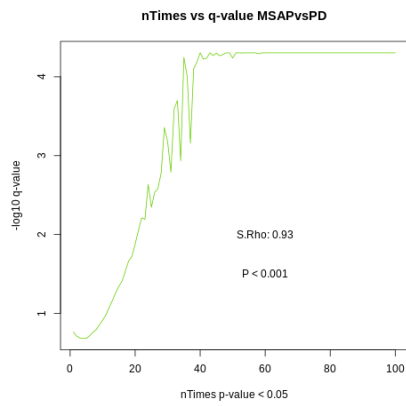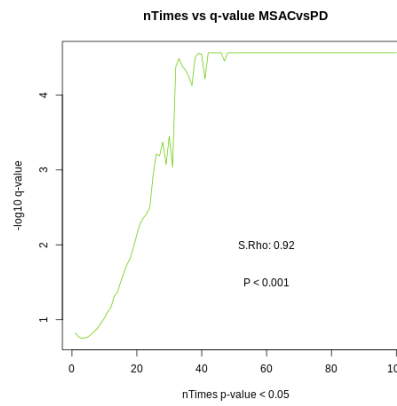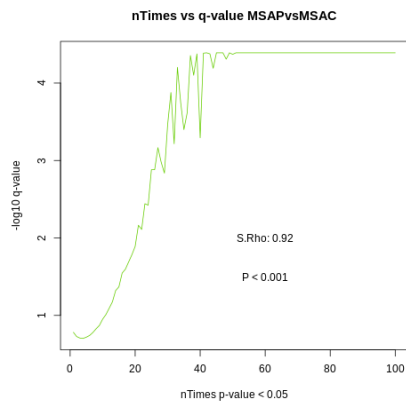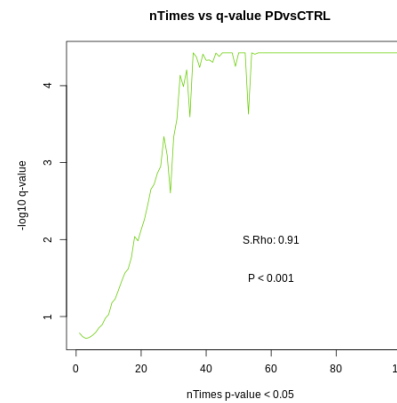

**Figure S2**
